# Supplementary material for: Differential transcription factor expression by human epithelial cells of buccal and urothelial derivation
Source: PubMed Central journal article supplement (PMC6092173; doi:10.1016/j.yexcr.2018.05.031), 2018-08-15
Supplement: mmc1.pdf [file mmc1.pdf]

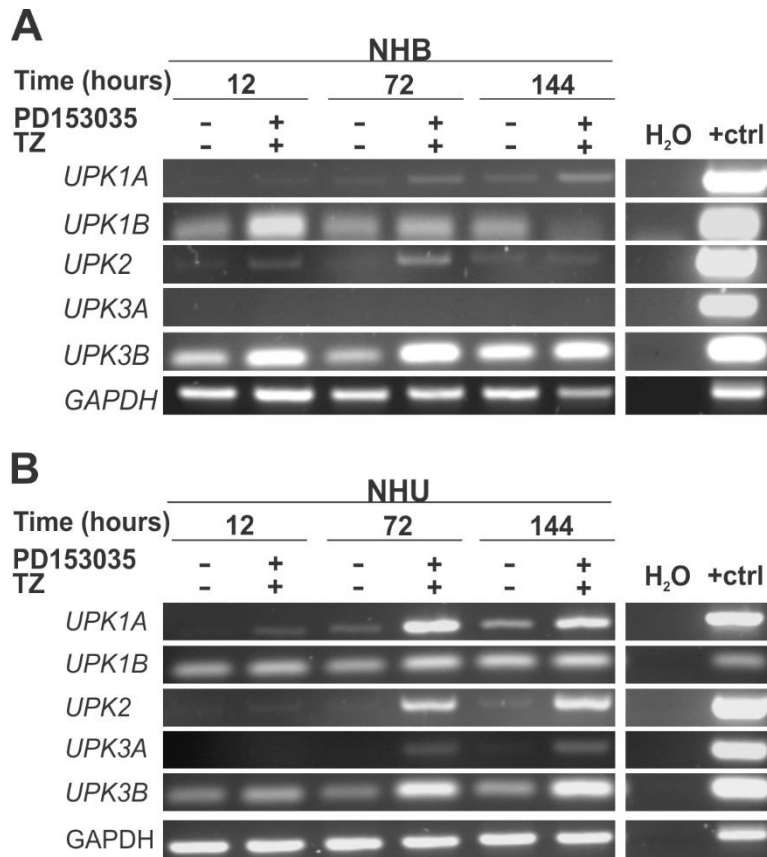

## Supplementary Figure 1

### Assessment of uroplakin gene expression by NHB and NHU cells *in vitro*.

(A-B) RT-PCR of uroplakin (*UPK1A*, *UPK1B*, *UPK2*, *UPK3A* and *UPK3B*) mRNA expression by (A) NHB and (B) NHU cell lines on RNA extracted at 12, 72 and 144 hours following treatment with TZ/PD. *GAPDH* was included as a housekeeping gene. RNA was digested with DNAase to remove any genomic DNA contamination and tested as RT-negative controls (not shown). Other shown controls include a no-template (H<sub>2</sub>O) negative and a genomic DNA positive control (+ctrl). Experiments were performed on n=2 independent NHB cell lines with similar results.
